# Supplementary material for: Single nucleotide polymorphism and haplotype effects associated with somatic cell score in German Holstein cattle
Source: PubMed Central journal article supplement (PMC4078941; doi:10.1186/1297-9686-46-35), 2014-06-04

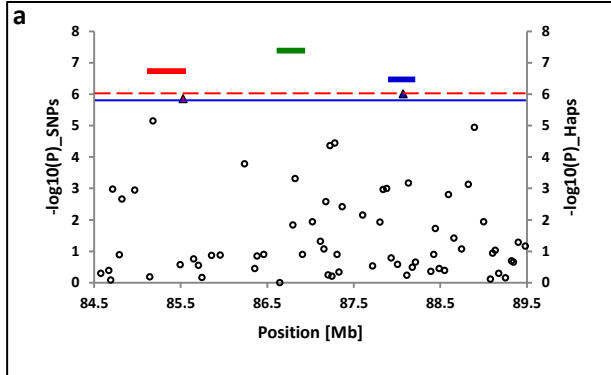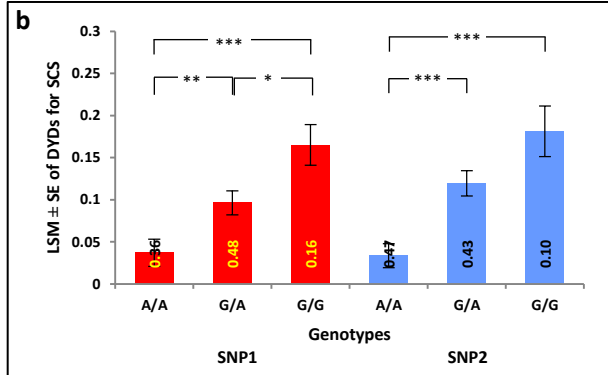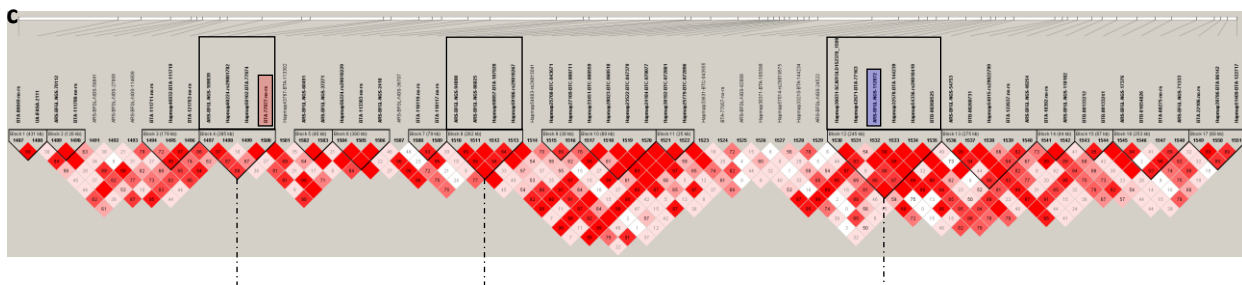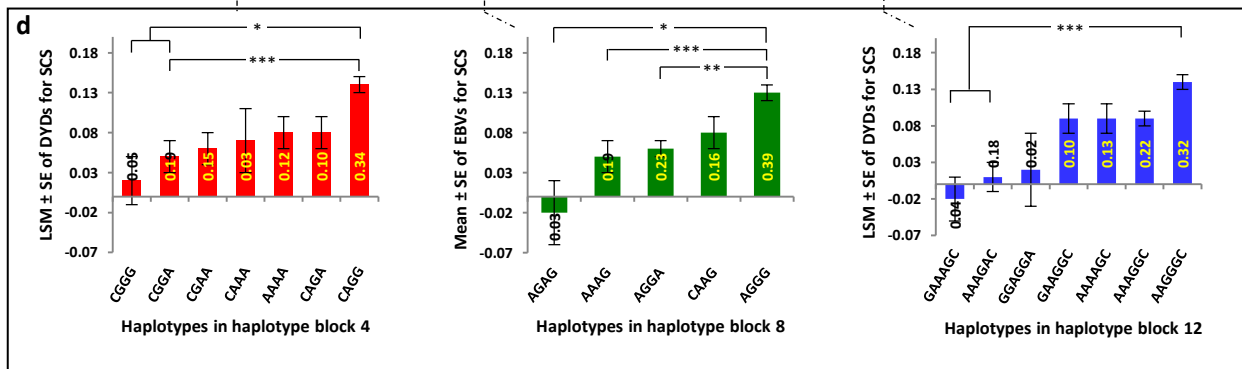

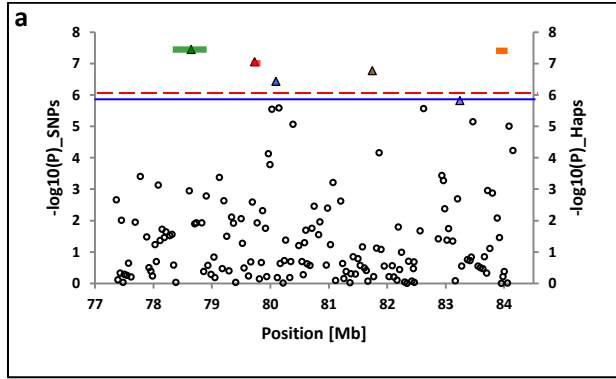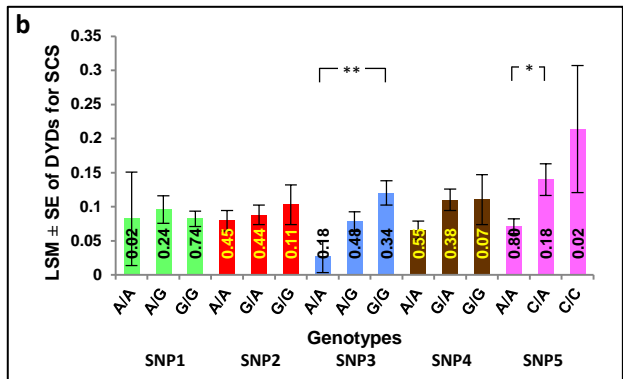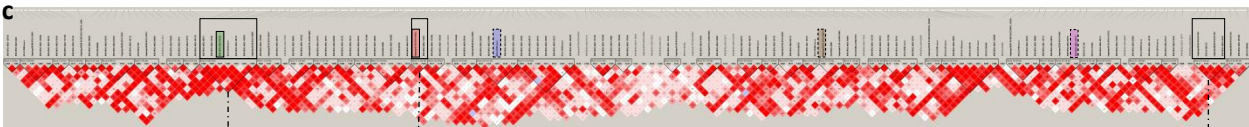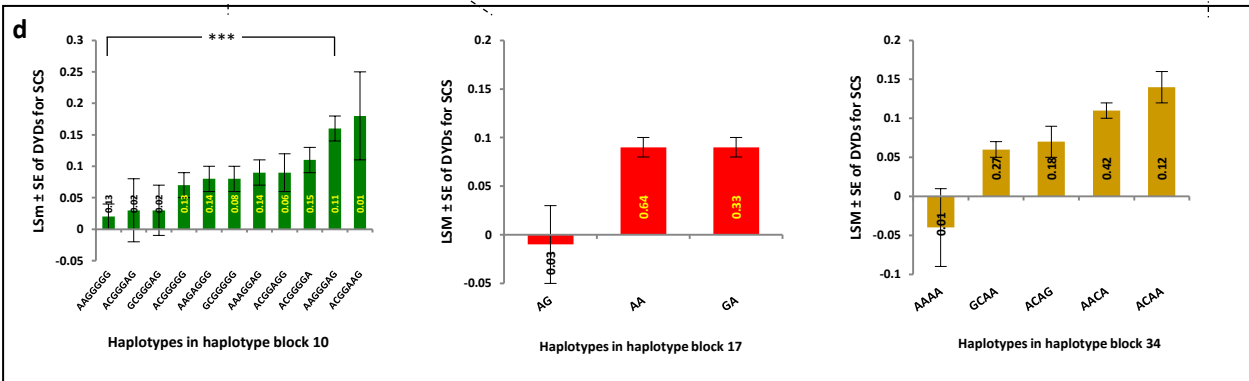

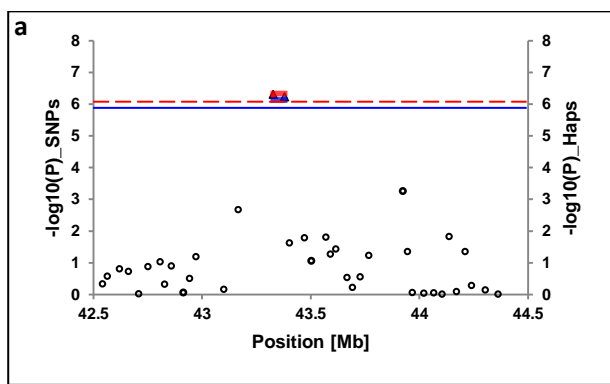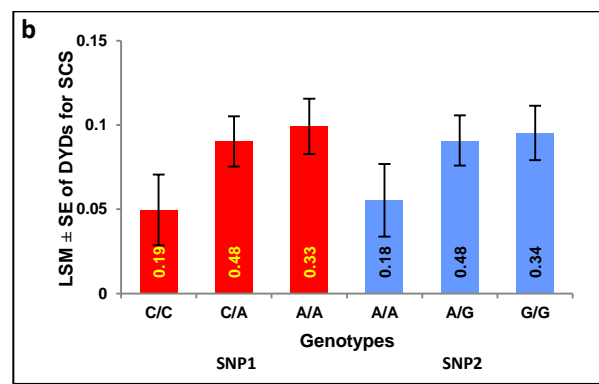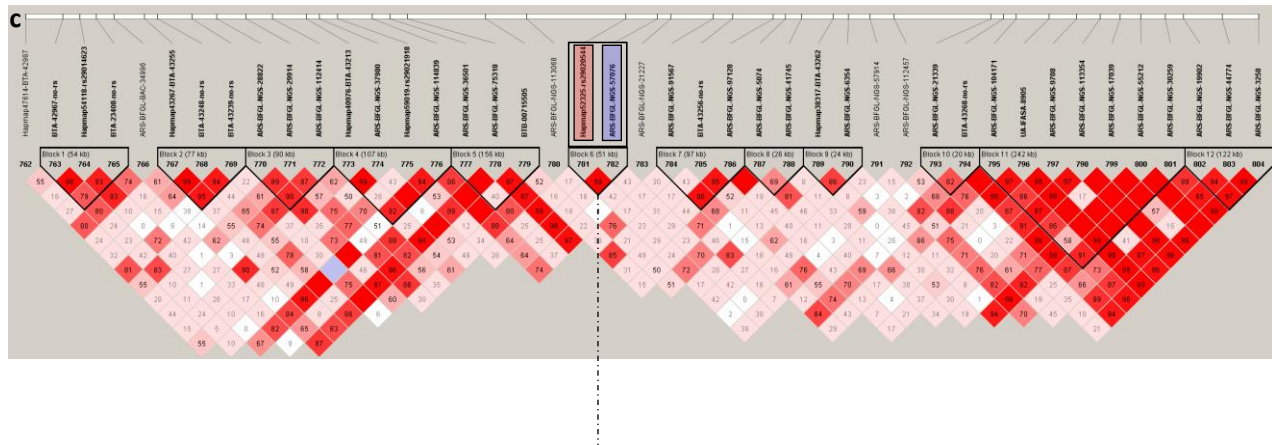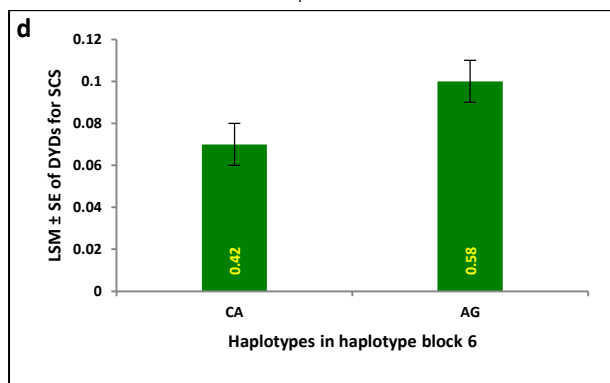

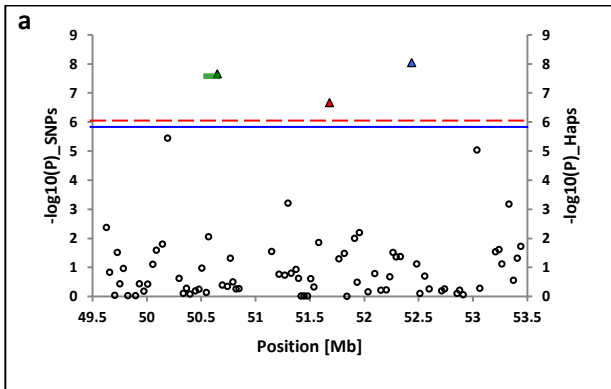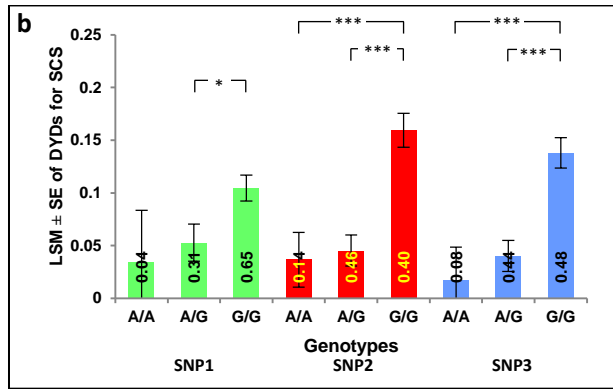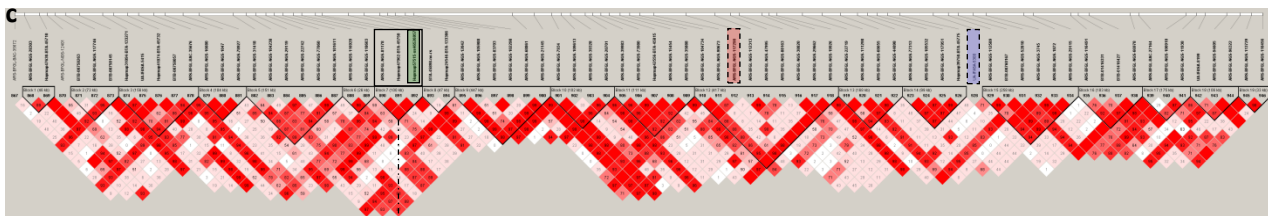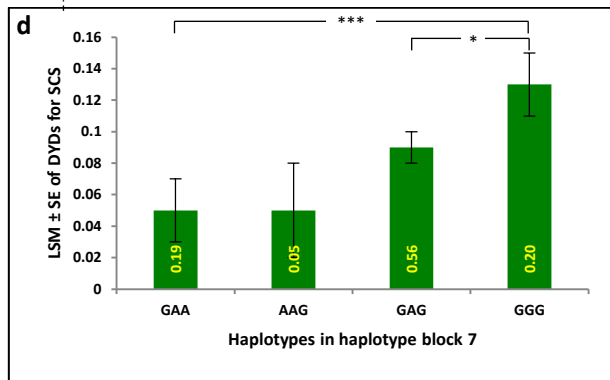

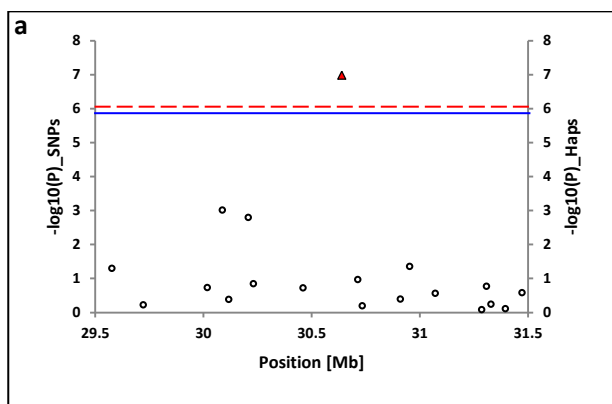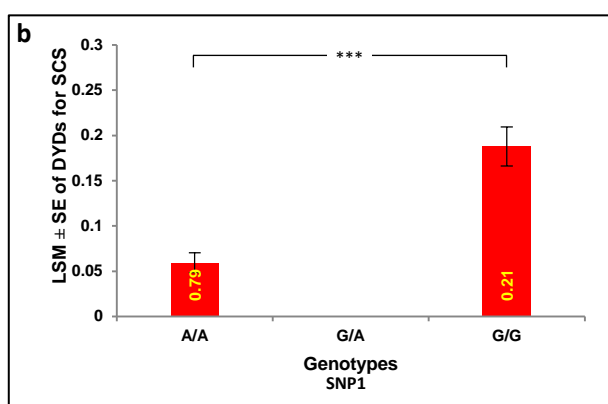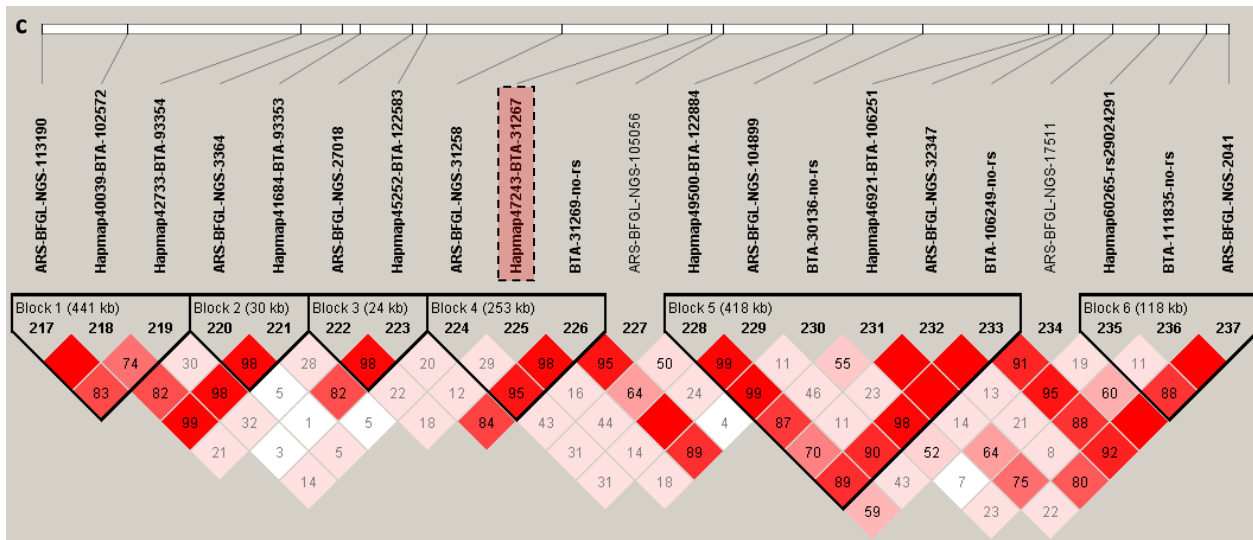

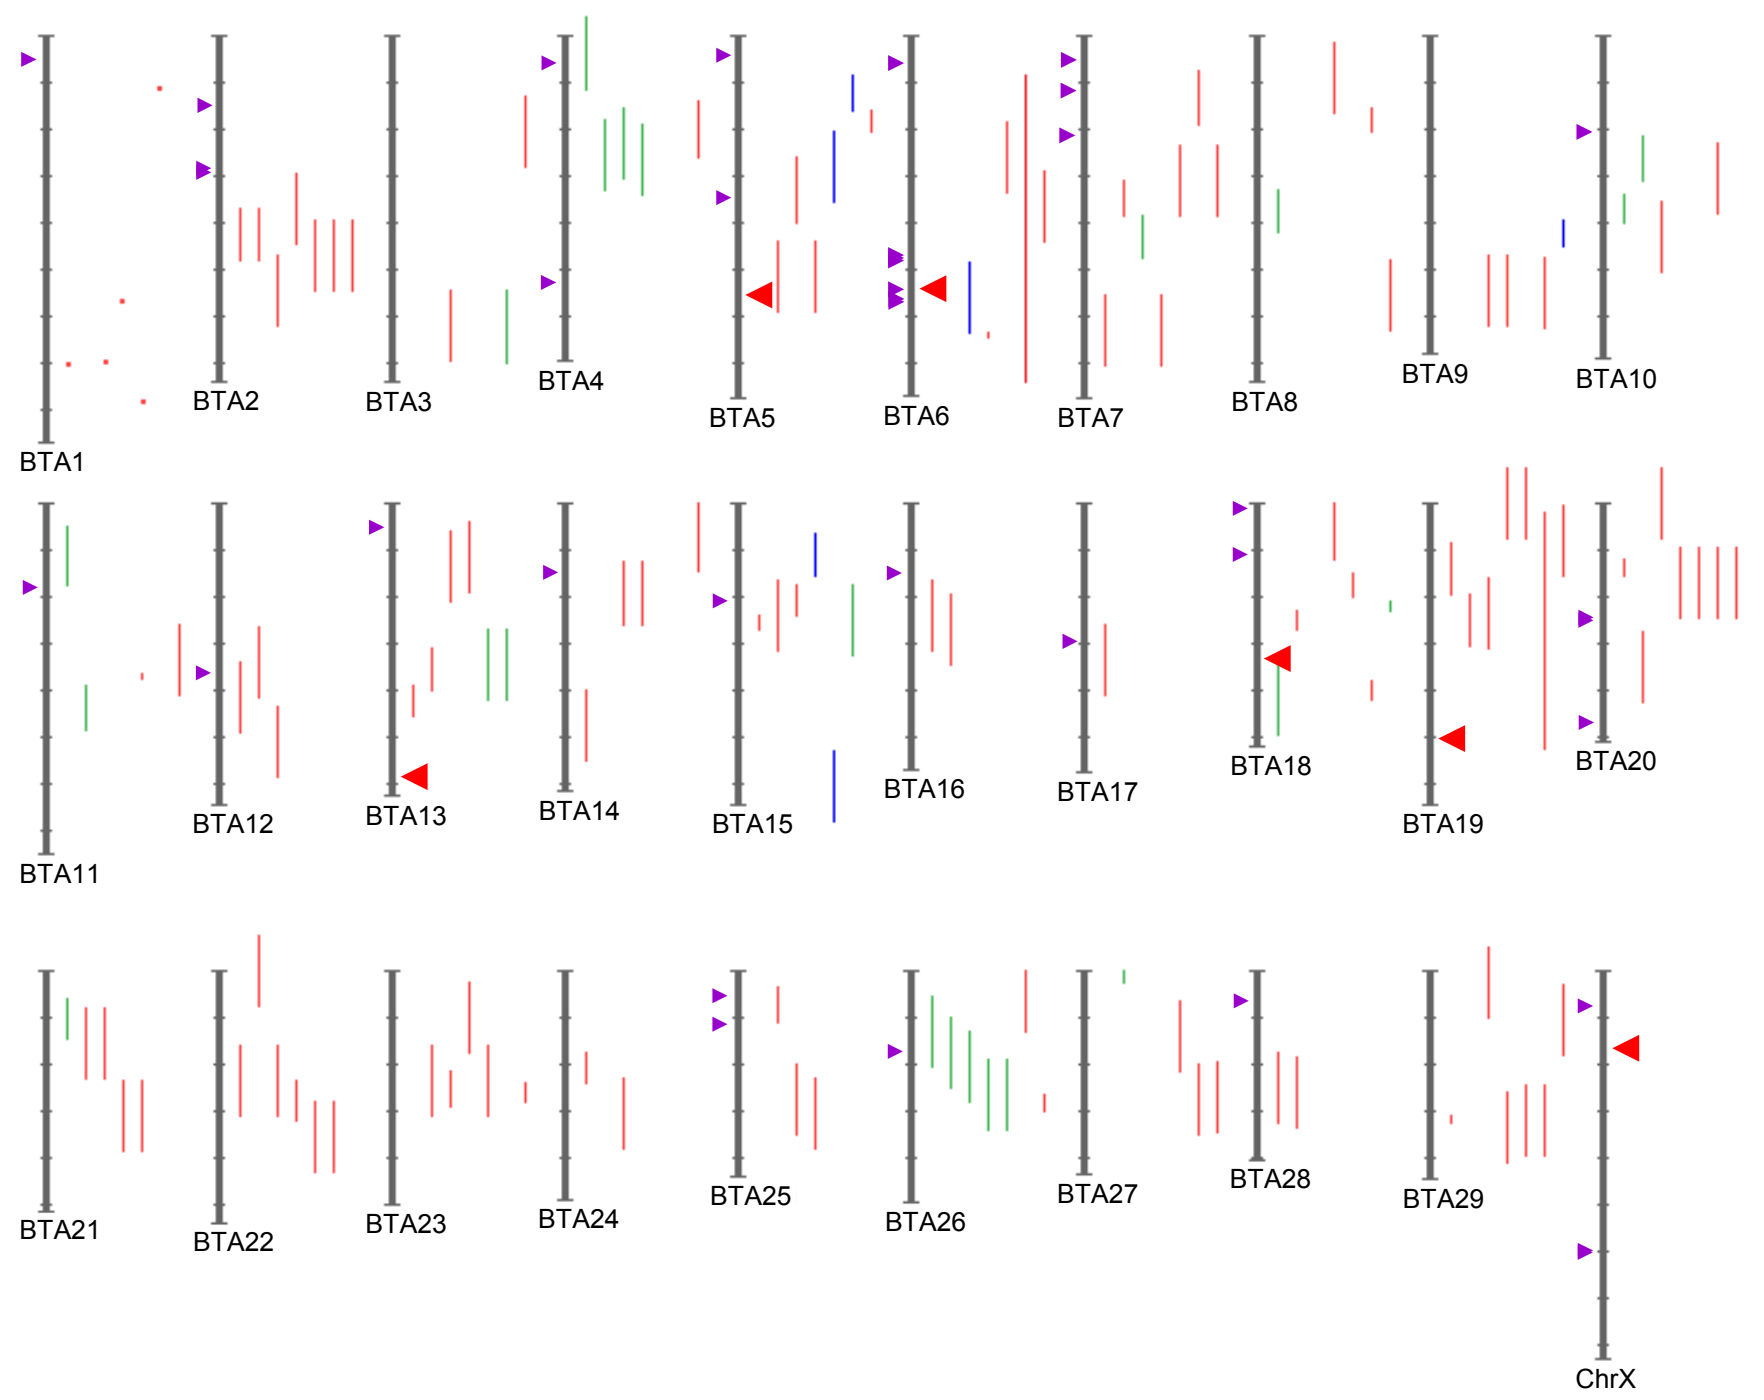

Supplement: 1297-9686-46-35-S1.pdf [file 1297-9686-46-35-S1.pdf]
